# Supplementary material for: Sumoylation of AMPKβ2 subunit enhances AMP-activated protein kinase activity
Source: PubMed Central journal article supplement — Mol Biol Cell. 2013 Jun 1;24(11):1801–11. doi: 10.1091/mbc.E12-11-0806 (PMC3667731; doi:10.1091/mbc.e12-11-0806), 2013-06-01

**Supplementary Fig. S1. Co-immunoprecipitation of PIASy and AMPK subunits.**

Human embryonic kidney cells (Hek293) were transfected with plasmids pFLAG-PIASy, and a combination of plasmids pCMV-HA-AMPK $\alpha$ 2, pCMV-myc-AMPK $\beta$ 2 and pCMV-HA-AMPK $\gamma$ 1, or pCMV-HA-AMPK $\alpha$ 2, pCMV-HA-AMPK $\beta$ 2 and pCMV-HA-AMPK $\gamma$  (as negative control of co-immunoprecipitation). Cell extracts were used in immunoprecipitation studies using anti-myc antibody (IP). The resulting immunoprecipitates were analyzed by Western blotting using anti-AMPK $\alpha$ , anti-AMPK $\beta$ , anti-AMPK $\gamma$  and anti-PIASy antibodies.

**Supplementary Fig. S2.** Leptomycin B prevents the nuclear export of AMPK complex. A) U2OS cells transfected with plasmids pFLAG-PIASy and pCMV-6xHis-SUMO2 were treated with 20 ng/ml leptomycin B for 20 min or left untreated. The subcellular localization of AMPK $\beta$ 2 subunit was carried out as described in Materials and Methods by using anti-AMPK $\beta$  as a primary and anti-rabbit Alexa-Fluor 488 as a secondary antibody. The same samples were also immunodetected with anti-FLAG as a primary and anti-mouse Texas Red as a secondary antibody to determine the localization of PIASy. All the samples were treated with Topro3 to stain the nucleus and the three images were subjected to a merge analysis. Notice that leptomycin B treatment induces the nuclear accumulation of endogenous AMPK $\beta$ . B) U2OS cells were also transfected with pFLAG-PIASy, pCMV-6xHis-SUMO2 and a combination of plasmids pCMV-myc-AMPK $\alpha$ 2, pCMV-myc-AMPK $\beta$ 2 and pCMV-myc-AMPK $\gamma$ 1. Cells were treated or not with leptomycin B and analyzed as in part A.

# FLAG-PIASy

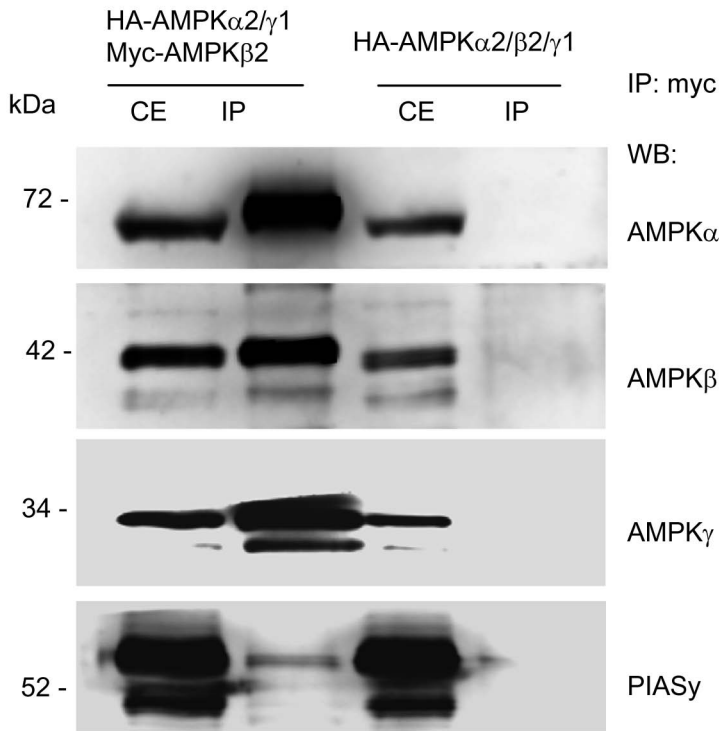

**A)** U2OS cells (FLAG-PIASY + SUMO2)

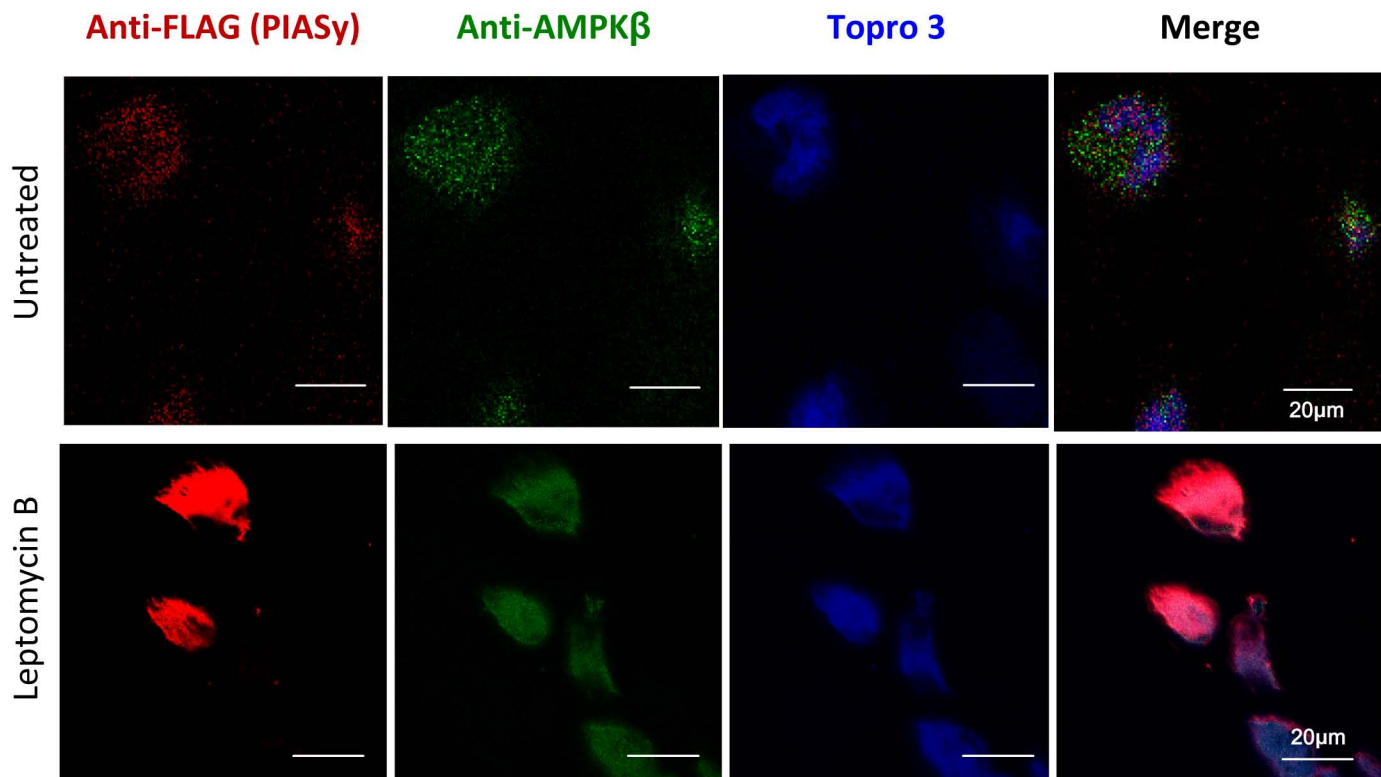

**B)** U2OS cells (FLAG-PIASY + SUMO2 + myc-AMPK $\alpha$ 2/ $\beta$ 2/ $\gamma$ 1)

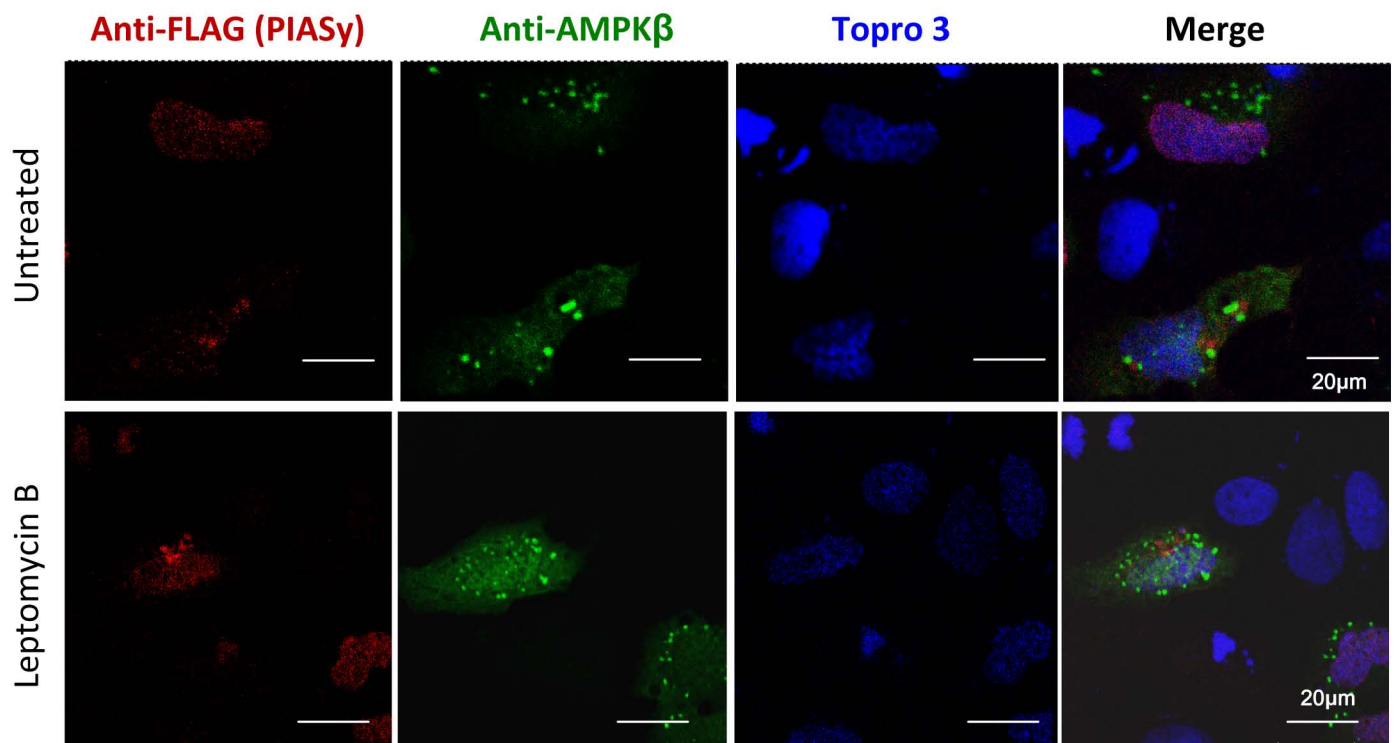

Supplement: supp_E12-11-0806v1_CombinedSupMats.pdf [file supp_E12-11-0806v1_CombinedSupMats.pdf]
